# Supplementary material
Source: PubMed Central journal article supplement (PMC8327118)
Supplement: sj-pdf-1-jcb-10.1177_0271678X20978523.pdf [file sj-pdf-1-jcb-10.1177_0271678X20978523.pdf]

Table S1: F344 rat averages of the perfusion fraction ( $f$ ), diffusion coefficient ( $D$ ), pseudo-diffusion coefficient ( $D^*$ ), average velocity ( $v$ ) and average capillary segment length ( $l$ ) for two models (VA – velocity autocorrelation model; and VA ballistic) with standard error of the mean.  $l$  is calculated using the relationship  $D^* = vl/6$ .

| Region                  | IVIM diffusive         |                                                      |                                                        | VA                           |                          | VA Ballistic                 |                          |
|-------------------------|------------------------|------------------------------------------------------|--------------------------------------------------------|------------------------------|--------------------------|------------------------------|--------------------------|
|                         | $f$                    | $D \times 10^{-4}$<br>( $\text{mm}^2\text{s}^{-1}$ ) | $D^* \times 10^{-3}$<br>( $\text{mm}^2\text{s}^{-1}$ ) | $v$<br>( $\text{mms}^{-1}$ ) | $l$<br>( $\mu\text{m}$ ) | $v$<br>( $\text{mms}^{-1}$ ) | $l$<br>( $\mu\text{m}$ ) |
| Striatum                | 0.0501 ± 0.0039        | 6.47 ± 0.046                                         | 1.90 ± 0.23                                            | 2.18 ± 0.13                  | 5.83 ± 1.4               | 1.00 ± 0.025                 | 12.0 ± 2.0               |
| Temporal Cortex         | 0.0340 ± 0.012         | 6.73 ± 0.18                                          | 4.45 ± 0.73                                            | 1.66 ± 0.24                  | 21.0 ± 4.4               | 1.03 ± 0.073                 | 26.5 ± 4.1               |
| Cingulate Cortex        | 0.0877 ± 0.0070        | 6.45 ± 0.064                                         | 6.65 ± 0.64                                            | 0.906 ± 0.054                | 50.3 ± 6.2               | 1.03 ± 0.049                 | 44.4 ± 7.2               |
| Entorhinal Cortex       | 0.0448 ± 0.0096        | 7.03 ± 0.14                                          | 2.82 ± 0.37                                            | 2.12 ± 0.21                  | 11.7 ± 4.1               | 1.14 ± 0.073                 | 17.6 ± 2.6               |
| Frontal Cortex          | 0.0614 ± 0.018         | 7.05 ± 0.22                                          | 7.36 ± 1.1                                             | 1.41 ± 0.25                  | 58.0 ± 17                | 1.25 ± 0.10                  | 45.8 ± 7.2               |
| Motor Cortex            | 0.0396 ± 0.0089        | 6.62 ± 0.045                                         | 1.93 ± 0.59                                            | 2.09 ± 0.28                  | 7.76 ± 3.6               | 1.05 ± 0.060                 | 13.7 ± 3.3               |
| Parietal Cortex         | 0.0380 ± 0.0056        | 6.647 ± 0.065                                        | 2.38 ± 0.28                                            | 1.91 ± 0.21                  | 9.74 ± 1.9               | 1.03 ± 0.031                 | 13.5 ± 2.0               |
| Hippocampus             | 0.0612 ± 0.010         | 7.13 ± 0.16                                          | 3.64 ± 0.23                                            | 1.34 ± 0.094                 | 18.5 ± 1.5               | 1.10 ± 0.052                 | 21.9 ± 1.2               |
| Hypothalamus            | 0.0793 ± 0.011         | 6.73 ± 0.097                                         | 2.51 ± 0.27                                            | 2.11 ± 0.20                  | 8.02 ± 1.1               | 1.09 ± 0.031                 | 14.7 ± 1.7               |
| Thalamus                | 0.0587 ± 0.010         | 6.44 ± 0.13                                          | 2.46 ± 0.46                                            | 1.81 ± 0.19                  | 11.8 ± 3.4               | 1.00 ± 0.034                 | 15.0 ± 2.8               |
| <b>Mean ± std error</b> | <b>0.0522 ± 0.0020</b> | <b>6.75 ± 0.032</b>                                  | <b>3.64 ± 0.24</b>                                     | <b>1.77 ± 0.068</b>          | <b>19.9 ± 2.3</b>        | <b>1.07 ± 0.018</b>          | <b>23.5 ± 1.9</b>        |

Table S2: WKY rat averages of the perfusion fraction ( $f$ ), diffusion coefficient ( $D$ ), pseudo-diffusion coefficient ( $D^*$ ), velocity ( $v$ ) and capillary segment length ( $l$ ) for two models (VA – velocity autocorrelation model; and VA ballistic) with standard error of the mean.  $l$  is calculated using the relationship  $D^* = vl/6$ .

| Region                  | IVIM diffusive          |                                                      |                                                        | VA                           |                          | VA ballistic                 |                          |
|-------------------------|-------------------------|------------------------------------------------------|--------------------------------------------------------|------------------------------|--------------------------|------------------------------|--------------------------|
|                         | $f$                     | $D \times 10^{-4}$<br>( $\text{mm}^2\text{s}^{-1}$ ) | $D^* \times 10^{-3}$<br>( $\text{mm}^2\text{s}^{-1}$ ) | $v$<br>( $\text{mms}^{-1}$ ) | $l$<br>( $\mu\text{m}$ ) | $v$<br>( $\text{mms}^{-1}$ ) | $l$<br>( $\mu\text{m}$ ) |
| Striatum                | 0.0559 ± 0.0041         | 6.40 ± 0.055                                         | 1.82 ± 0.19                                            | 2.15 ± 0.082                 | 4.80 ± 0.55              | 0.994 ± 0.033                | 10.5 ± 1.2               |
| Temporal Cortex         | 0.0568 ± 0.0070         | 6.68 ± 0.073                                         | 4.80 ± 1.2                                             | 1.57 ± 0.35                  | 26.5 ± 8.5               | 1.11 ± 0.19                  | 32.7 ± 9.9               |
| Cingulate Cortex        | 0.108 ± 0.0051          | 6.38 ± 0.081                                         | 7.52 ± 0.68                                            | 0.924 ± 0.079                | 54.2 ± 7.0               | 1.07 ± 0.067                 | 42.4 ± 4.5               |
| Entorhinal Cortex       | 0.0524 ± 0.0066         | 6.86 ± 0.11                                          | 2.99 ± 0.74                                            | 2.09 ± 0.25                  | 13.6 ± 5.4               | 1.15 ± 0.14                  | 21.7 ± 9.0               |
| Frontal Cortex          | 0.0727 ± 0.020          | 6.94 ± 0.34                                          | 10.1 ± 2.5                                             | 1.06 ± 0.12                  | 75.6 ± 22                | 1.09 ± 0.099                 | 64.8 ± 17                |
| Motor Cortex            | 0.0539 ± 0.0045         | 6.70 ± 0.084                                         | 2.66 ± 0.33                                            | 2.57 ± 0.18                  | 6.52 ± 0.94              | 1.12 ± 0.026                 | 14.8 ± 1.6               |
| Parietal Cortex         | 0.0483 ± 0.0032         | 6.60 ± 0.059                                         | 3.54 ± 0.21                                            | 1.97 ± 0.29                  | 12.5 ± 3.5               | 1.05 ± 0.044                 | 19.8 ± 2.4               |
| Hippocampus             | 0.0824 ± 0.0057         | 6.95 ± 0.055                                         | 4.31 ± 0.43                                            | 1.54 ± 0.15                  | 19.4 ± 3.6               | 1.08 ± 0.051                 | 24.1 ± 3.2               |
| Hypothalamus            | 0.112 ± 0.0073          | 6.95 ± 0.10                                          | 3.97 ± 0.26                                            | 2.20 ± 0.21                  | 12.6 ± 1.8               | 1.15 ± 0.035                 | 20.8 ± 1.2               |
| Thalamus                | 0.0645 ± 0.0047         | 6.40 ± 0.10                                          | 2.62 ± 0.35                                            | 2.01 ± 0.28                  | 10.8 ± 3.6               | 1.05 ± 0.045                 | 14.9 ± 2.6               |
| <b>Mean ± std error</b> | <b>0.0648 ± 0.00038</b> | <b>6.73 ± 0.029</b>                                  | <b>4.48 ± 0.39</b>                                     | <b>1.86 ± 0.068</b>          | <b>22.2 ± 3.0</b>        | <b>1.08 ± 0.027</b>          | <b>26.3 ± 2.6</b>        |

Table S3: Percentage outliers removed over all regions for each parameter and strain.  $D^*$  is the pseudo diffusion coefficient and  $v$  is average blood velocity, from the velocity autocorrelation (VA) and VA ballistic models.

| Region            | F344                       |            |                        | WKY                        |            |                        |
|-------------------|----------------------------|------------|------------------------|----------------------------|------------|------------------------|
|                   | $D^*$<br>IVIM<br>diffusive | $v$<br>VA  | $v$<br>VA<br>Ballistic | $D^*$<br>IVIM<br>diffusive | $v$<br>VA  | $v$<br>VA<br>Ballistic |
| Striatum          | 13                         | 16         | 5.9                    | 20                         | 10         | 0                      |
| Temporal Cortex   | 7.1                        | 5.9        | 24                     | 10                         | 20         | 0                      |
| Cingulate Cortex  | 19                         | 11         | 0                      | 0                          | 10         | 0                      |
| Entorhinal Cortex | 23                         | 0          | 0                      | 0                          | 0          | 0                      |
| Frontal Cortex    | 8.3                        | 13         | 0                      | 0                          | 25         | 22                     |
| Motor Cortex      | 20                         | 0          | 12                     | 0                          | 0          | 22                     |
| Parietal Cortex   | 12                         | 0          | 12                     | 30                         | 0          | 11                     |
| Hippocampus       | 29                         | 12         | 0                      | 0                          | 10         | 0                      |
| Hypothalamus      | 25                         | 0          | 12                     | 10                         | 0          | 0                      |
| Thalamus          | 25                         | 0          | 0                      | 10                         | 0          | 0                      |
| <b>Mean</b>       | <b>18</b>                  | <b>5.8</b> | <b>6.6</b>             | <b>8</b>                   | <b>7.5</b> | <b>5.5</b>             |

Table S4: Repeated-measures two-way analysis of variance (ANOVA) p-values for the pseudo-diffusion coefficient ( $D^*$ ), average blood velocity ( $v$ ) and the average capillary segment length ( $l$ ) for the velocity autocorrelation (VA) and VA ballistic models.

| Factors         | $D^*$             | $v$   |              | $l$                  |              |
|-----------------|-------------------|-------|--------------|----------------------|--------------|
|                 | IVIM<br>diffusive | VA    | VA ballistic | VA                   | VA ballistic |
| Genotype        | 0.073             | 0.51  | 0.98         | 0.21                 | 0.055        |
| Region          | 0.054             | 0.029 | 0.14         | $1.8 \times 10^{-5}$ | 0.11         |
| Region*Genotype | 0.65              | 0.48  | 0.38         | 0.056                | 0.96         |

Table S5: Voxel-wise signal to noise ratio (SNR) for four diffusion-times at  $b=10 \text{ smm}^{-2}$ , averaged across F344 rats using the mean ( $\pm$  standard error of the mean).

| Region            | Diffusion-time (ms) |                 |                 |                 |
|-------------------|---------------------|-----------------|-----------------|-----------------|
|                   | 50                  | 40              | 20              | 11.6            |
| Striatum          | $13.8 \pm 0.18$     | $14.4 \pm 0.11$ | $14.6 \pm 0.15$ | $14.4 \pm 0.24$ |
| Temporal cortex   | $12.3 \pm 1.0$      | $11.0 \pm 1.3$  | $12.3 \pm 1.3$  | $13.2 \pm 1.4$  |
| Cingulate cortex  | $14.2 \pm 0.31$     | $17.7 \pm 0.50$ | $17.4 \pm 0.30$ | $17.3 \pm 0.68$ |
| Entorhinal cortex | $11.3 \pm 0.73$     | $11.0 \pm 0.24$ | $12.9 \pm 0.45$ | $11.7 \pm 0.75$ |
| Frontal cortex    | $6.17 \pm 0.92$     | $7.46 \pm 0.64$ | $7.38 \pm 0.92$ | $7.73 \pm 0.77$ |
| Motor cortex      | $2.80 \pm 0.32$     | $8.58 \pm 0.29$ | $8.08 \pm 0.88$ | $7.79 \pm 0.93$ |
| Parietal cortex   | $9.50 \pm 0.75$     | $13.3 \pm 0.98$ | $11.6 \pm 0.56$ | $11.8 \pm 0.97$ |
| Hippocampus       | $14.9 \pm 0.34$     | $14.2 \pm 0.29$ | $15.1 \pm 0.32$ | $15.7 \pm 0.43$ |
| Hypothalamus      | $13.1 \pm 0.28$     | $13.3 \pm 0.69$ | $13.4 \pm 0.73$ | $14.4 \pm 0.77$ |
| Thalamus          | $14.2 \pm 0.34$     | $14.0 \pm 0.31$ | $13.8 \pm 0.19$ | $14.3 \pm 0.46$ |

#### *Animal breeding, housing, and husbandry*

Fischer 344 rats were purchased from Terrence Town labs at the University of Southern California and then aged in-house. Wistar-Kyoto rats were purchased from Janvier Labs, France, and aged in-house. Throughout their lifetime, animals were housed in a conventional rodent facility in individually ventilated cages (between 3-4 animals per cage). The facility had a 12/12 hour dawn/dusk cycle, beginning at 7.30 am. Bedding was aspen woodchip and paper sizzle nest. Animals were given the following environmental enrichment: sizzle nest, play tunnels, aspen bricks (chew sticks) and aspen balls. Housing temperature and humidity were maintained at 19-23°C and 45-65% respectively, conforming to the Home Office code of practice for housing rodents. All animals were fed ad libitum on the BK001(E) diet (standard diet) and given free access to water. Animal health was checked daily and respiratory problems assessed prior to anaesthesia. After MRI, animals were recovered until they were able to take food and water, then returned to housing.
